# Supplementary material for: Beyond quantum confinement: excitonic nonlocality in halide perovskite nanoparticles with Mie resonances
Source: Royal Society of Chemistry journal article supplement (doi:10.1039/c8nr09837a), 2019-01-01
Supplement: c8nr09837a1.pdf [file c8nr09837a1.pdf]

**Supporting information for: “Beyond Quantum Confinement: Excitonic Nonlocality  
in Halide Perovskite Nanoparticles with Mie Resonances”**

A. S. Berestennikov,<sup>1</sup> Y. Li,<sup>2</sup> I. V. Iorsh,<sup>1</sup> A.A. Zakhidov,<sup>1,3</sup> A. L. Rogach,<sup>2</sup> and S. V. Makarov<sup>1</sup>

<sup>1</sup>*ITMO University, 49 Kronverkskii pr., Saint Petersburg 197101, Russia.*

<sup>2</sup>*City University of Hong Kong, 83 Tat Chee Avenue, Kowloon, Hong Kong SAR.*

<sup>3</sup>*University of Texas at Dallas, Richardson TX 75080, USA.*

# 1. DIELECTRIC PERMITTIVITY FOR PEROVSKITE NANOPARTICLE WITH NONLOCAL AND QUANTUM CONFINEMENT CONTRIBUTIONS

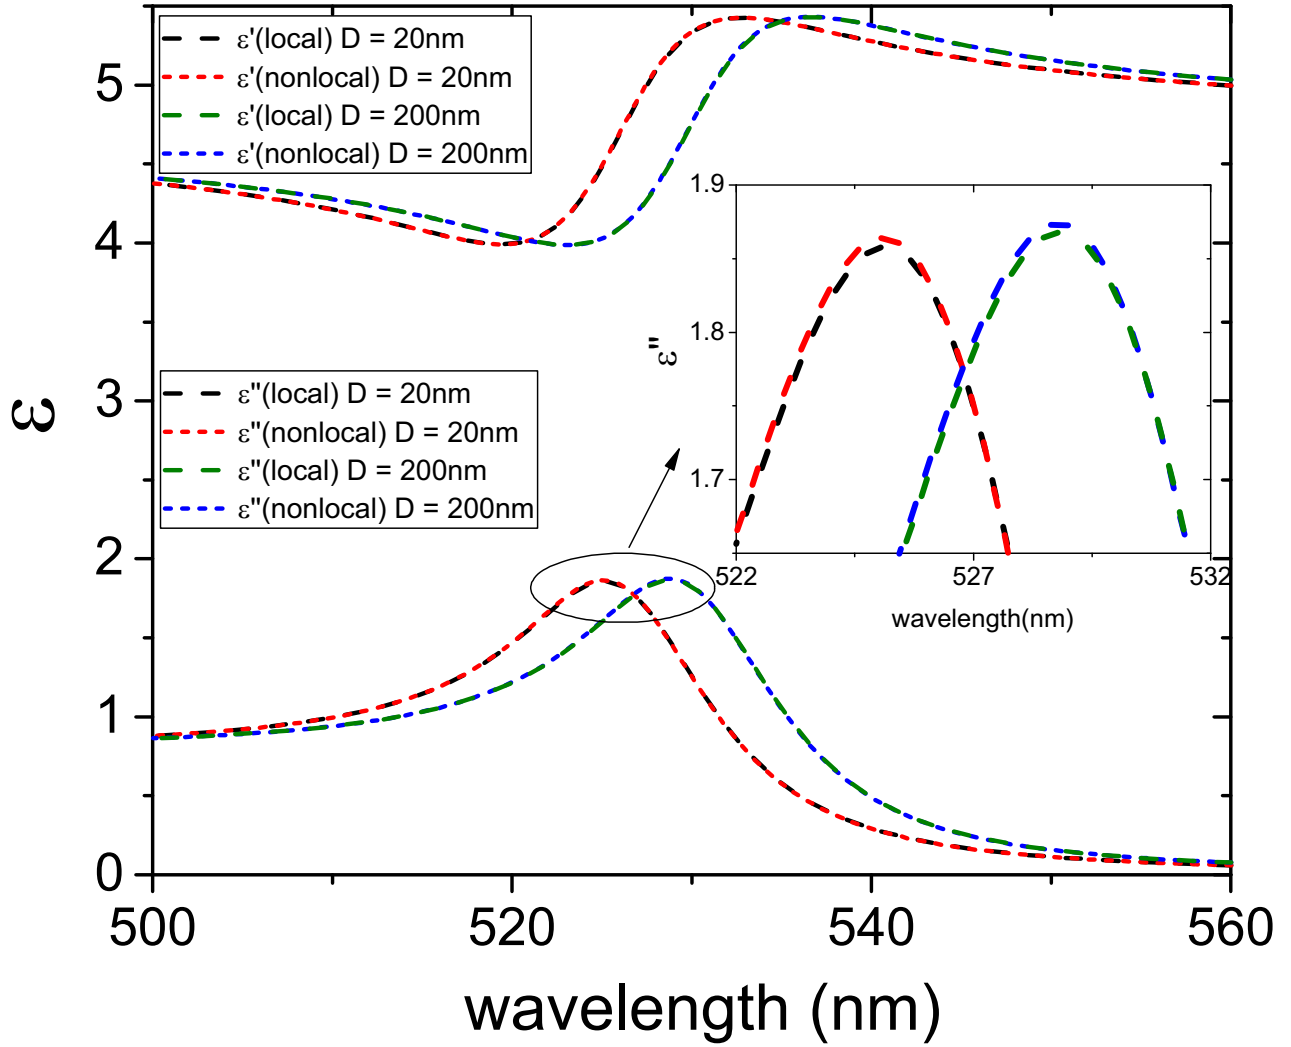

Figure S1. Calculated spectral dependencies of the real and the imaginary parts of the dielectric permittivity for MAPbBr<sub>3</sub> perovskite spherical nanoparticle with diameters  $D=200$  nm  $D=20$  nm in local (green and black dashed lines) and nonlocal (blue and red dashed lines) cases. In the local case, permittivity have been calculated by using Eq.(3) with  $k=0$ . In the nonlocal case, permittivity have been calculated by Eq.(3) with  $k_0 = \sqrt{\epsilon_{loc}(\omega)} \times \omega/c$ , where  $\epsilon_{loc}(\omega)$  is the permittivity in the local case.

## 2. MODES DECOMPOSITION FOR A PEROVSKITE NANOPARTICLE

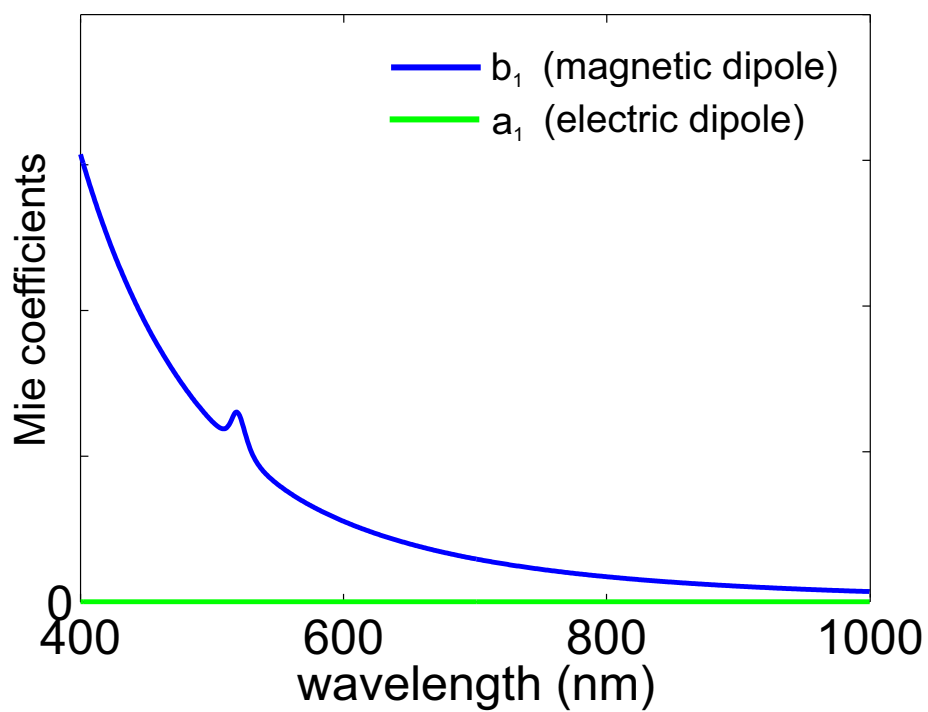

Figure S2. Spectral dependencies of the first Mie coefficients calculated without nonlocality for MAPbBr<sub>3</sub> perovskite spherical nanoparticle with diameter  $D=20$  nm.

### 3. COMPARISON OF THE MIE THEORY OF THE SPATIALLY DISPERSIVE DIELECTRIC SPHERES WITH DATA FOR OTHER COMPOSITIONS OF THE PEROVSKITES

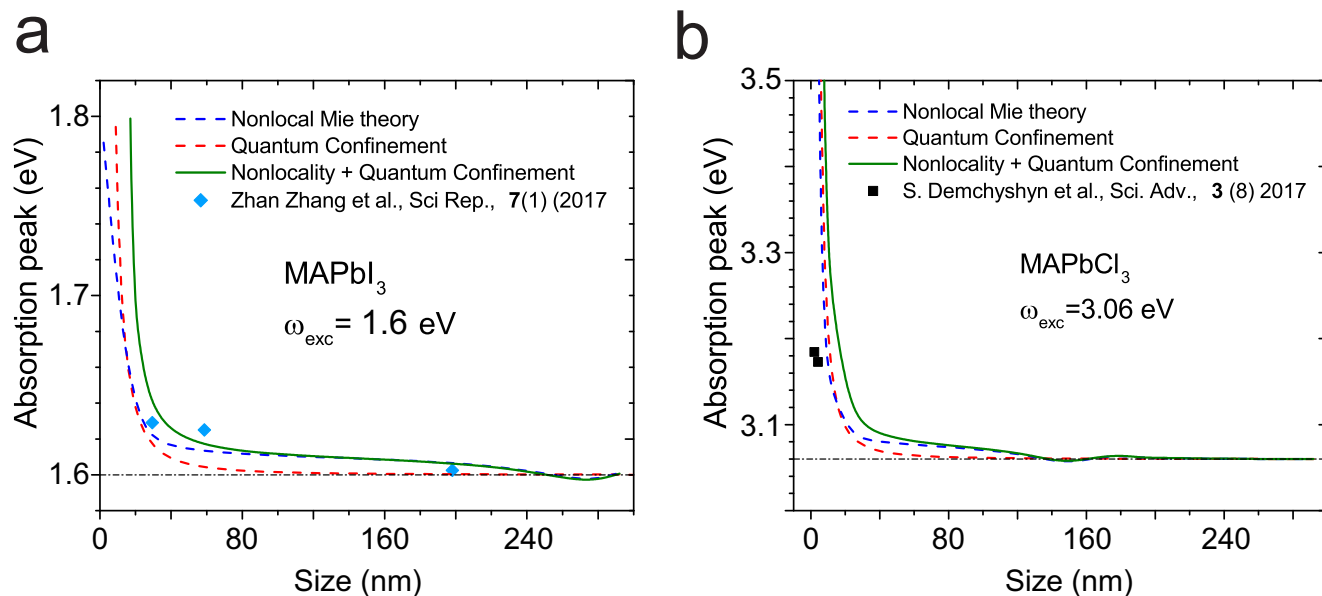

Figure S3. Calculated dependencies of absorption cross section blue shift related to nonlocality in MAPbI<sub>3</sub> (a) and MAPbCl<sub>3</sub> (b) perovskite spherical nanoparticles. Dots correspond to experimental values from the given references.
